# Supplementary material for: Combining Process Modelling and LCA to Assess the Environmental Impacts of Wastewater Treatment Innovations
Source: MDPI journal article supplement (doi:10.3390/w13091246), 2021-04-29
Supplement: s1 [file s1]

Archive with 1 entries (1 files):
- water-1190776 - suppl. update.pdf
