# Supplementary material for: Combining Process Modelling and LCA to Assess the Environmental Impacts of Wastewater Treatment Innovations
Source: MDPI journal article supplement (doi:10.3390/w13091246), 2021-04-29
Supplement: s1 [file s1 › water-1190776 - suppl. update.pdf]

## Supplementary Materials

# Combining Process Modelling and LCA to Assess the Environmental Impacts of Wastewater Treatment Innovations

Aleš Paulu <sup>1,\*</sup>, Jan Bartáček <sup>2</sup>, Markéta Šerešová <sup>1</sup> and Vladimír Kočí <sup>1</sup>

<sup>1</sup> Department of Environmental Chemistry; Faculty of Environmental Technology; University of Chemistry and Technology Prague; Technická 5, 160 00 Prague, Czech Republic; Marketa.Seresova@vscht.cz (M.Š.); Vlad.Koci@vscht.cz (V.K.)

<sup>2</sup> Department of Water Technology and Environmental Engineering; Faculty of Environmental Technology; University of Chemistry and Technology Prague; Technická 5, 160 00 Prague, Czech Republic; jan.bartacek@vscht.cz

\* Correspondence: paulua@vscht.cz

**Table S1.** Data inputs for mass and energy balance model.

| Parameter                                                                  | Value     | Unit              | Reference                           |
|----------------------------------------------------------------------------|-----------|-------------------|-------------------------------------|
| <b>General wastewater characteristics</b>                                  |           |                   |                                     |
| Influent COD flow                                                          | 49 200.00 |                   | (PCWTP—personal communication 2016) |
| Influent COD <sub>dissolved</sub> concentration                            | 0.30      | kg/m <sup>3</sup> | (Henze and Comeau 2008)             |
| Influent COD <sub>solid</sub> concentration                                | 0.45      | kg/m <sup>3</sup> | (Henze and Comeau 2008)             |
| Influent N <sub>total</sub> flow at WWTP with influent COD of 120 000 kg/d | 9500*     | kg/d              | (PCWTP—personal communication 2016) |
| N <sub>total,dissolved</sub> per N <sub>total</sub> in influent            | 0.78      |                   | (Henze and Comeau 2008)             |
| Influent P <sub>total</sub> concentration                                  | 7.49      | mg/l              | (Andreoli et al. 2007)              |
| Effluent P <sub>total</sub> concentration                                  | 1.00      | mg/l              | (Andreoli et al. 2007)              |
| Recirculation rate of internal recirculation                               | 3.00      |                   | Arbitrarily defined                 |
| Recirculation rate of return sludge                                        | 2.00      |                   | Arbitrarily defined                 |
| COD per TOC in wastewater                                                  | 3.02      |                   | (Pitter 2009)                       |
| Person Load of COD per day                                                 | 0.12      | kg/d              | (Henze and Comeau 2008)             |
| <b>General sludge stream characteristics</b>                               |           |                   |                                     |
| Primary sludge VSS                                                         | 50.00     | kg/m <sup>3</sup> | (PCWTP—personal communication 2016) |
| Return sludge VSS                                                          | 5.90      | kg/m <sup>3</sup> | (PCWTP—personal communication 2016) |
| Excess sludge VSS                                                          | 6.80      | kg/m <sup>3</sup> | (PCWTP—personal communication 2016) |
| Stabilized sludge VSS                                                      | 30.00     | kg/m <sup>3</sup> | (PCWTP—personal communication 2016) |
| Dewatered sludge VSS                                                       | 350.00    | kg/m <sup>3</sup> | (von Sperling and Gonçalves 2007)   |

|                                                                                                |              |                   |                                      |
|------------------------------------------------------------------------------------------------|--------------|-------------------|--------------------------------------|
| Activated sludge VSS                                                                           | 3.87         | kg/m <sup>3</sup> | (PCWTP—personal communication 2016)  |
| Sludge COD <sub>dissolved</sub> per VSS                                                        | 1.480        |                   | (Foladori 2010)                      |
| Primary, return and excess sludge VSS per TSS                                                  | 0.775        |                   | (von Sperling and Gonçalves 2007)    |
| Stabilized sludge VSS per TSS                                                                  | 0.720        |                   | (PCWTP—personal communication 2016)  |
| Dewatered sludge VSS per TSS                                                                   | 0.650        |                   | (von Sperling and Gonçalves 2007)    |
| Activated sludge VSS per TSS                                                                   | 0.575        |                   | (von Sperling and Gonçalves 2007)    |
| <b>Parameters of primary clarification process <sup>1</sup></b>                                |              |                   |                                      |
| Primary clarification efficiency on COD <sub>solid</sub> removal                               | 0.53         |                   | (Metcalf & Eddy Inc. 2002)           |
| Primary clarification efficiency on COD removal                                                | 0.36         |                   | (Metcalf & Eddy Inc. 2002)           |
| Primary clarification emissions of CH <sub>4</sub> at Kralingseveer WWTP                       | 1.00*        | kg/h**            | (Daelman et al. 2012)                |
| The share of primary clarification electricity consumption in the consumption of whole WWTP    | 3.70         | %                 | (Tassou 1988)                        |
| <b>Parameters of activated sludge process <sup>2</sup></b>                                     |              |                   |                                      |
| Denitrification rate of COD <sub>dissolved</sub> removal per N <sub>NH4+</sub>                 | 2.40         | g/g               | Arbitrarily defined                  |
| Denitrification rate of COD <sub>solid</sub> removal per N <sub>NH4+</sub>                     | 0.46         | g/g               | Arbitrarily defined                  |
| Denitrification biomass yield                                                                  | 0.67         | g/g               | (Hauduc et al., 2010)                |
| Nitrification efficiency                                                                       | 0.95         | g/g               | Arbitrarily defined                  |
| Denitrification efficiency                                                                     | 0.99         | g/g               | Arbitrarily defined                  |
| Biomass content of N <sub>total</sub>                                                          | 0.083        | g/g               | (Hauduc et al., 2010)                |
| Nitrification removal efficiency of COD                                                        | 0.90         | g/g               | Arbitrarily defined                  |
| Nitrification autotrophic biomass yield                                                        | 0.24         | g/g               | (Hauduc et al., 2010)                |
| Nitrification heterotrophic biomass yield                                                      | 0.63         | g/g               | (Hauduc et al., 2010)                |
| Activated sludge process emission factor of N-N <sub>2</sub> O per influent N <sub>total</sub> | 2.80         | %                 | (Daelman et al. 2013)                |
| Activated sludge process emissions of CH <sub>4</sub> at Kralingseveer WWTP                    | 2.00*        | kg/h**            | (Daelman et al. 2012)                |
| Air supply to activated sludge process electricity consumption at WWTP of 410 000 PE           | 2 790 495.00 | kWh/y**           | (Veolia—personal communication 2019) |
| Pumping to activated sludge process electricity consumption at WWTP of 410 000 PE              | 1 642 937.00 | kWh/y**           | (Veolia—personal communication 2019) |
| Mixing in activated sludge process electricity consumption at WWTP of 410 000 PE               | 743 820.00   | kWh/y**           | (Veolia—personal communication 2019) |
| <b>Parameters of secondary clarification process</b>                                           |              |                   |                                      |
| Secondary clarification emissions of CO <sub>2</sub>                                           | 0.53         | kg/PE/y**         | (Kosse et al. 2018)                  |
| Effluent COD <sub>dissolved</sub> concentration                                                | 0.020        | kg/m <sup>3</sup> | Arbitrarily defined                  |
| Effluent COD <sub>solid</sub> concentration                                                    | 0.002        | kg/m <sup>3</sup> | Arbitrarily defined                  |
| Effluent N <sub>total,dissolved</sub> concentration                                            | 0.007        | kg/m <sup>3</sup> | Arbitrarily defined                  |
| Effluent N <sub>total,solid</sub> concentration                                                | 0.000        | kg/m <sup>3</sup> | Arbitrarily defined                  |
| <b>Parameters of anaerobic digestion process <sup>3</sup></b>                                  |              |                   |                                      |
| Anaerobic digestion efficiency on COD <sub>dissolved</sub> removal in primary sludge           | 0.74         |                   | (Mahdy et al. 2015)                  |

|                                                                                             |              |                    |                                      |
|---------------------------------------------------------------------------------------------|--------------|--------------------|--------------------------------------|
| Anaerobic digestion efficiency on COD <sub>solid</sub> removal in primary sludge            | 0.74         |                    | (Mahdy et al. 2015)                  |
| Anaerobic digestion efficiency on COD <sub>dissolved</sub> removal in mixed sludge          | 0.62         |                    | (Astals et al. 2013)                 |
| Anaerobic digestion efficiency on COD <sub>solid</sub> removal in mixed sludge              | 0.62         |                    | (Astals et al. 2013)                 |
| Content of CH <sub>4</sub> in biogas                                                        | 0.61         |                    | (PCWTP—personal communication 2016)  |
| Sludge thickening electricity consumption at WWTP of 410 000 PE                             | 1 156 433.00 | kWh/y**            | (Veolia—personal communication 2019) |
| Mixing in anaerobic digestion electricity consumption at WWTP of 410 000 PE                 | 493 078.00   | kWh/y**            | (Veolia—personal communication 2019) |
| <b>Parameters of cogeneration unit <sup>4</sup></b>                                         |              |                    |                                      |
| Emissions of CH <sub>4</sub> per total CH <sub>4</sub> generated by cogeneration unit       | 1.73         | %                  | (Liebetrau et al. 2010)              |
| Electrical energy yield per volume of biogas                                                | 1.843        | kWh/m <sup>3</sup> | (Dohányos 1998)                      |
| <b>Parameters of dewatering process</b>                                                     |              |                    |                                      |
| Digested sludge buffer tank emissions of CH <sub>4</sub> at Kralingseveer WWTP              | 4.00*        | kg/h**             | (Daelman et al. 2012)                |
| Centrifuge's emissions of CH <sub>4</sub> at Kralingseveer WWTP                             | 1.00*        | kg/h**             | (Daelman et al. 2012)                |
| Dewatered sludge storage tank emissions of CH <sub>4</sub> at Kralingseveer WWTP            | 2.00*        | kg/h**             | (Daelman et al. 2012)                |
| Reject water COD <sub>dissolved</sub> concentration                                         | 0.50         | kg/m <sup>3</sup>  | (Henze and Comeau 2008)              |
| Reject water COD concentration                                                              | 1.16         | kg/m <sup>3</sup>  | (Henze and Comeau 2008)              |
| Reject water N <sub>total,dissolved</sub> concentration                                     | 0.45         | kg/m <sup>3</sup>  | (Henze and Comeau 2008)              |
| Reject water N <sub>total,solid</sub> concentration                                         | 0.16         | kg/m <sup>3</sup>  | Arbitrarily defined                  |
| Reject water volume                                                                         | 930.00       | m <sup>3</sup> /d  | (PCWTP—personal communication 2016)  |
| Dewatering electricity consumption at WWTP of 410 000 PE                                    | 2 841 863.00 | kWh/y**            | (Veolia—personal communication 2019) |
| Ventilation and odor cleaning electricity consumption at WWTP of 410 000 PE                 | 1 572 932.00 | kWh/y**            | (Veolia—personal communication 2019) |
| <b>Parameters of sludge disposal</b>                                                        |              |                    |                                      |
| Percentual distribution of stabilized sludge used in agriculture in the Czech Republic      | 48.00        | %                  | (Eurostat 2015)                      |
| Percentual distribution of stabilized sludge used for composting in the Czech Republic      | 35.00        | %                  | (Eurostat 2015)                      |
| Percentual distribution of stabilized sludge disposed by landfilling in the Czech Republic  | 10.00        | %                  | (Eurostat 2015)                      |
| Percentual distribution of stabilized sludge disposed by incineration in the Czech Republic | 7.00         | %                  | (Eurostat 2015)                      |
| <b>Parameters of chemically enhanced primary treatment (CEPT) <sup>5</sup></b>              |              |                    |                                      |
| CEPT efficiency on COD <sub>solid</sub> removal                                             | 0.75         |                    | (Metcalf & Eddy Inc. 2002)           |
| CEPT efficiency on N <sub>total,dissolved</sub> removal                                     | 0.17         |                    | (PCWTP—personal                      |

|                                                                               |          |      |                                      |
|-------------------------------------------------------------------------------|----------|------|--------------------------------------|
|                                                                               |          |      | communication 2016)                  |
| CEPT efficiency on COD removal                                                | 0.55     |      | (PCWTP—personal communication 2016)  |
| CEPT iron (III) sulfate 40% solution dose                                     | 2 557.17 | kg/d | (Veolia—personal communication 2019) |
| <b>Parameters of partial nitrificationanammox (PN/A) process <sup>6</sup></b> |          |      |                                      |
| PN/A efficiency on COD removal                                                | 70.00    | %    | (Castro-Barros et al. 2015)          |
| PN/A efficiency on N <sub>total,dissolved</sub> removal                       | 93.00    | %    | (Castro-Barros et al. 2015)          |
| PN/A efficiency on N <sub>total</sub> removal                                 | 76.60    | %    | (Castro-Barros et al. 2015)          |
| PN/A emission factor of N-N <sub>2</sub> O per influent N <sub>total</sub>    | 2.00     | %    | (Castro-Barros et al. 2015)          |

\* Re-calculated later to suit the parameters of influent wastewater described by this study. \*\* Converted to daily values under the assumption that an operating day is a theoretical average WWTP's day of continual operation with no emergencies or other unexpected events. <sup>1</sup> We considered same efficiency of removal for COD and N<sub>total</sub>. <sup>2</sup> CO<sub>2</sub> and N<sub>2</sub> emissions from nitrification and denitrification were calculated from COD and N<sub>total</sub> mass balances of these processes. <sup>3</sup> We assumed no nitrogenous compounds present in biogas. <sup>4</sup> Biogas yield and emissions of CO<sub>2</sub> were calculated from COD mass balance of this process. <sup>5</sup> We considered same efficiency of removal for COD<sub>solid</sub> and N<sub>total,solid</sub>. <sup>6</sup> Electricity consumption of activated sludge process and PN/A unit in Scenario 2 were calculated regarding the amount of influent N<sub>total</sub> to these processes. CO<sub>2</sub> and N<sub>2</sub> emissions from PN/A process were calculated from COD and N<sub>total</sub> mass balance of this process.

**Table S2.** Additional life-cycle assessment data.

| Name                          | Notes                                                                                                                                                                                                                             | Reference        |
|-------------------------------|-----------------------------------------------------------------------------------------------------------------------------------------------------------------------------------------------------------------------------------|------------------|
| Electricity grid mix          | Average specific electricity supply in Czech Republic including consumption, distribution, and import. The origin being 42% lignite, 32% nuclear and other.                                                                       | (thinkstep 2019) |
| Iron (III) sulfate production | Data set covering all relevant process steps and technologies of life cycle of iron (III) sulfate                                                                                                                                 | (thinkstep 2019) |
| Composting *                  | Open windrow composting plant, without collection and transport of waste but including the production of good quality compost and the utilization of compost. The plant is based on the treatment of average biodegradable waste. | (thinkstep 2019) |
| Landfill                      | Data set covering all relevant process steps and technologies for the treatment of waste on a landfill. Including landfill gas utilization and leachate treatment and without collection, transport, and pre-treatment.           | (thinkstep 2019) |
| Incineration                  | Average European waste-to-energy plant, without collection, transport, and pre-treatment. The plant is based on the treatment of average European municipal solid waste.                                                          | (thinkstep 2019) |

\* This process was attributed to stabilized sludge, which was used for composting and in agriculture in the Czech Republic (83%), as we assumed these two disposal techniques have very similar environmental impacts.

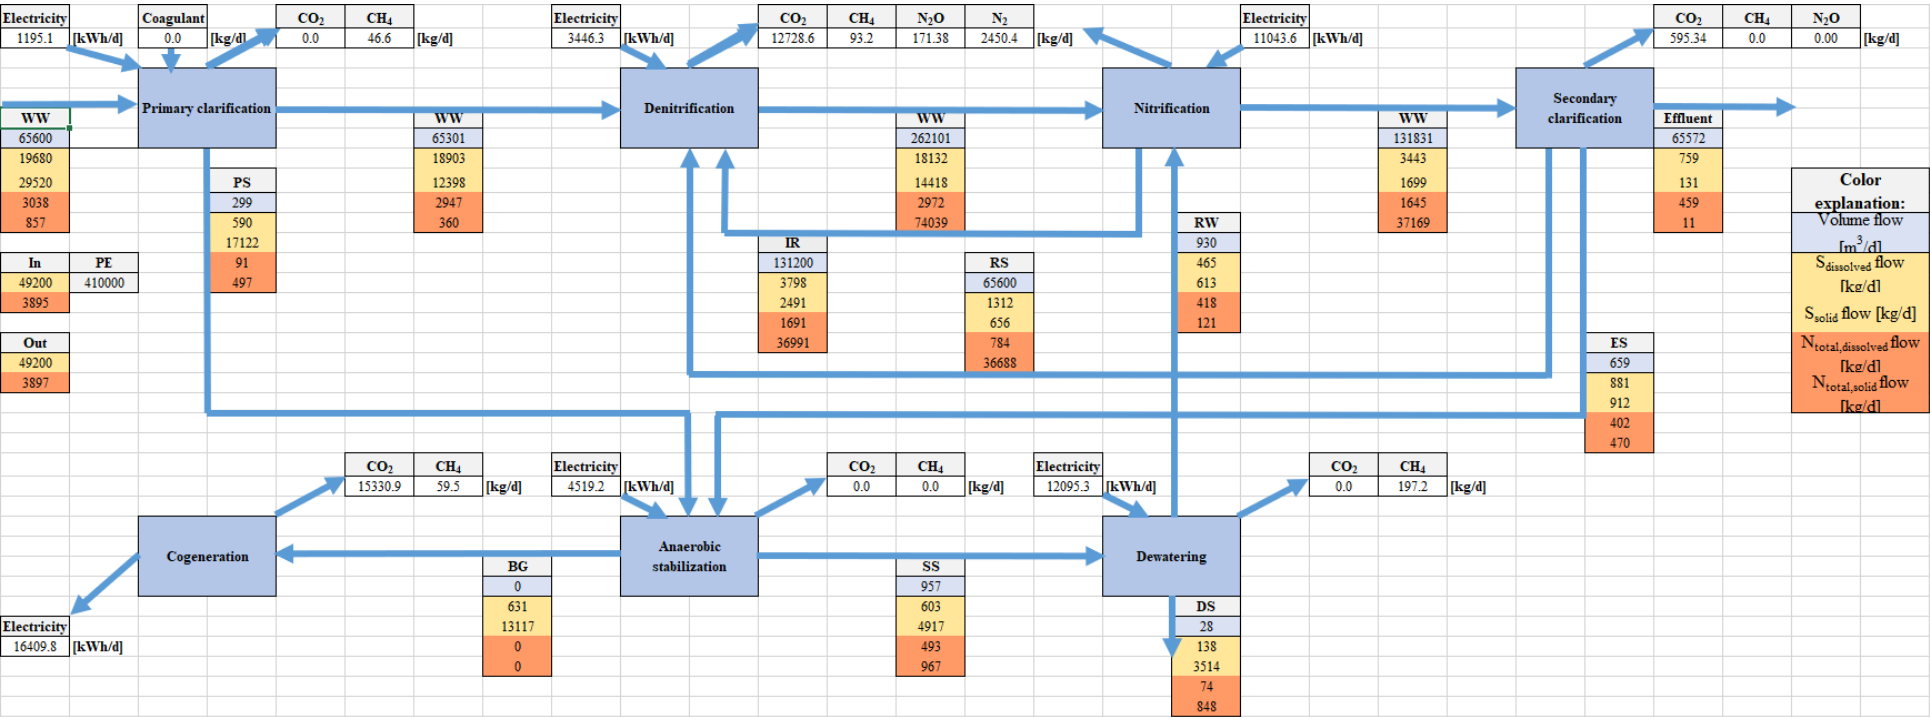

**Figure S1.** Screenshot of mass and energy balance model scheme for Scenario 1 in MS Excel software. WW = Wastewater, PS = Primary sludge, IR = Internal recirculation, RS = Return sludge, RW = Reject water, ES = Excess sludge, BG = Biogas, SS = Stabilized sludge, DS = Dewatered sludge.

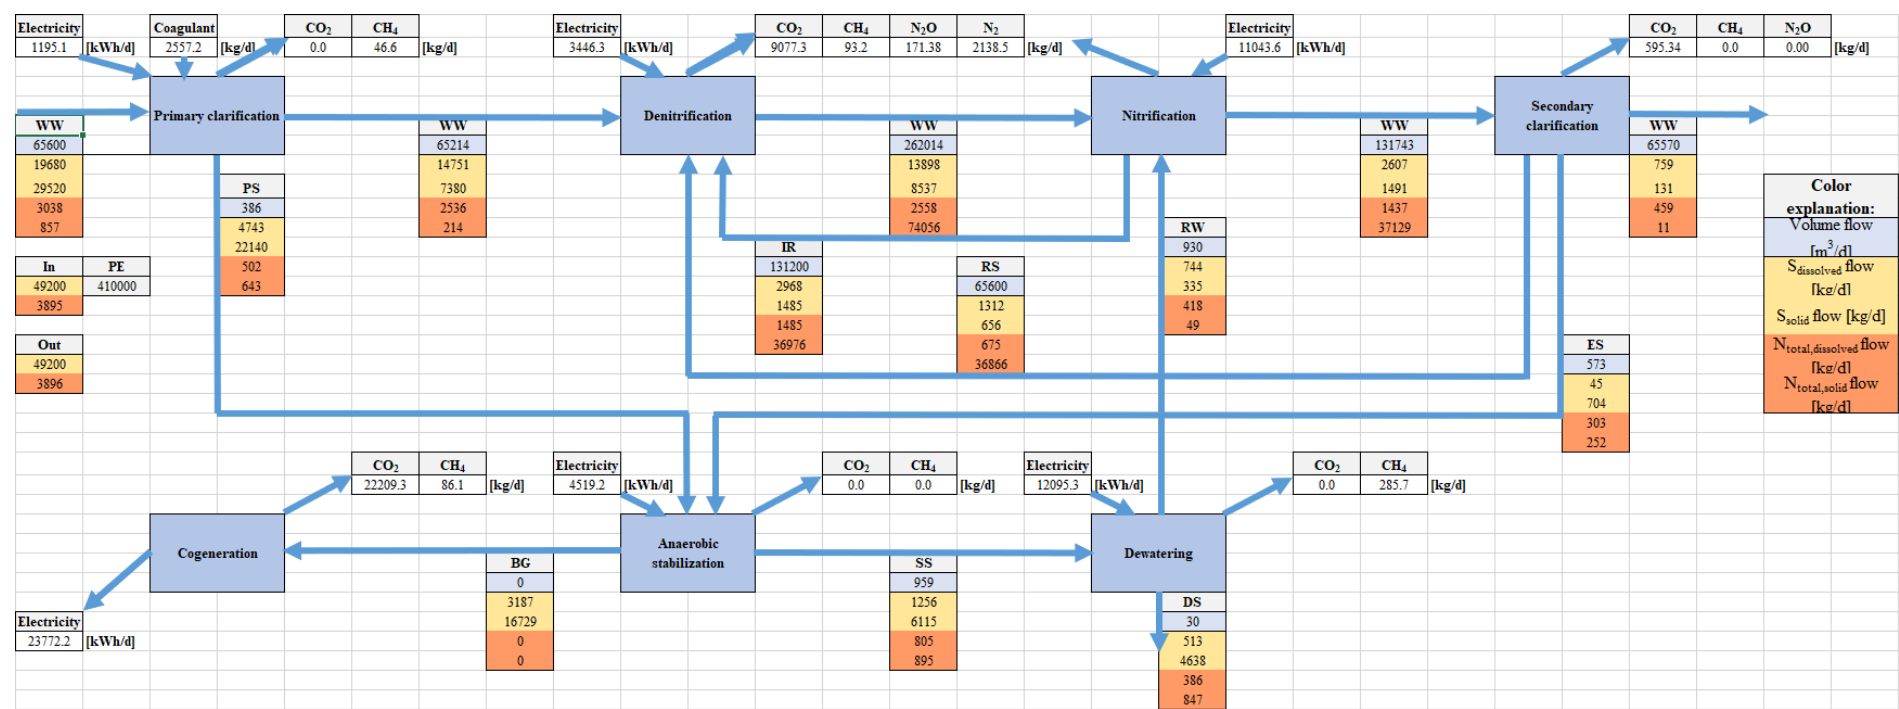

**Figure S2.** Screenshot of mass and energy balance model scheme for Scenario 2 in MS Excel software. WW = Wastewater, PS = Primary sludge, IR = Internal recirculation, RS = Return sludge, RW = Reject water, ES = Excess sludge, BG = Biogas, SS = Stabilized sludge, DS = Dewatered sludge.

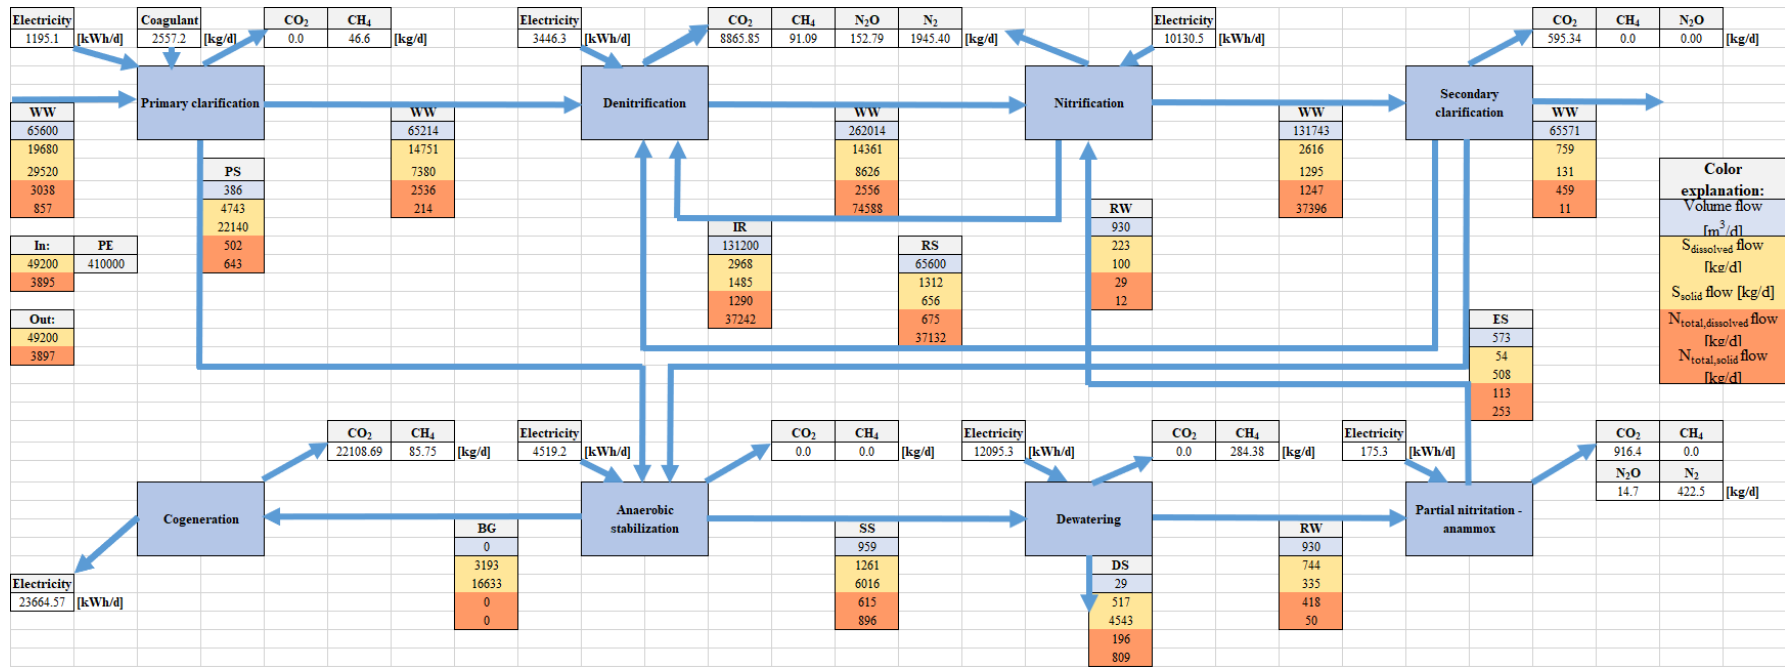

**Figure S3.** Screenshot of mass and energy balance model scheme for Scenario 3 in MS Excel software. WW = Wastewater, PS = Primary sludge, IR = Internal recirculation, RS = Return sludge, RW = Reject water, ES = Excess sludge, BG = Biogas, SS = Stabilized sludge, DS = Dewatered sludge.

## References

- PCWTP (Prague Central Wastewater Treatment Plant, Prague, Czech Republic). Personal communication, 2016.
- Henze, M.; Comeau, Y. Wastewater Characterization. In *Biological Wastewater Treatment: Principles, Modelling and Design*; IWA Publishing: London, UK, 2008; pp. 33–52.
- Von Sperling, M.; Gonçalves, R.F. Sludge characteristics and production. In *Sludge Treatment and Disposal*; IWA Publishing: London, UK, 2007; pp. 4–30.
- Pitter, P. General composition of waters (Obecné složení vod). In *Hydrochemistry (Hydrochemie)*, 4th ed.; UCT (VŠCHT): Prague, Czech Republic, 2009; pp. 29–68.
- Foladori, P. Sludge composition and production in full-plants. In *Sludge Reduction Technologies in Wastewater Treatment Plants*; IWA Publishing: London, UK, 2010; Volume 9, pp. 7–20.
- Metcalf & Eddy Inc. Physical Unit Operations. In *Wastewater Engineering: Treatment and Reuse*, 4th ed.; McGraw-Hill Higher Education: New York, NY, USA, 2002; pp. 311–474.
- Daelman, M.R.J.; van Voorthuizen, E.M.; van Dongen, U.G.J.M.; Volcke, E.I.P.; van Loosdrecht, M.C.M. Methane emission during municipal wastewater treatment. *Water Res.* **2012**, *46*, 3657–3670.
- Tassou, S.A. Energy conservation and resource utilisation in waste-water treatment plants. *Appl. Energy* **1988**, *30*, 113–129.
- Hauduc, H.; Rieger, L.; Takács, I.; Héduit, A.; Vanrolleghem, P.A.; Gillot, S. A systematic approach for model verification: Application on seven published activated sludge models. *Water Sci. Technol.* **2010**, *61*, 825–839.
- Daelman, M.R.J.; van Voorthuizen, E.M.; van Dongen, U.G.J.M.; Volcke, E.I.P.; van Loosdrecht, M.C.M. Methane and nitrous oxide emissions from municipal wastewater treatment—Results from a long-term study. *Water Sci. Technol.* **2013**, *67*, 2350–2355.
- Veolia (Aubervilliers, France). Benchmarking of Large WWTPs with Anaerobic Digestion of the Veolia Group. Personal communication, 2019.
- Kosse, P.; Kleeberg, T.; Lübken, M.; Matschullat, J.; Wichern, M. Quantifying direct carbon dioxide emissions from wastewater treatment units by nondispersive infrared sensor (NDIR)—A pilot study. *Sci. Total Environ.* **2018**, *633*, 140–144.
- Mahdy, A.; Mendez, L.; Ballesteros, M.; González-Fernández, C. Algal culture integration in conventional wastewater treatment plants: Anaerobic digestion comparison of primary and secondary sludge with microalgae biomass. *Bioresour. Technol.* **2015**, *184*, 236–244.
- Astals, S.; Esteban-Gutiérrez, M.; Fernández-Arévalo, T.; Aymerich, E.; García-Heras, J.L.; Mata-Alvarez, J. Anaerobic digestion of seven different sewage sludges: A biodegradability and modelling study. *Water Res.* **2013**, *47*, 6033–6043.
- Liebetrau, J.; Clemens, J.; Cuhls, C.; Hafermann, C.; Friehe, J.; Weiland, P.; Daniel-Gromke, J. Methane emissions from bio-gas-producing facilities within the agricultural sector. *Eng. Life Sci.* **2010**, *10*, 595–599.
- Dohányos, M. *Anaerobic Treatment Technologies (Anaerobní Čistírenské Technologie)*, 1st ed.; NOEL 2000: Brno, Czech Republic, 1998; p. 343.
- Eurostat: Sewage Sludge Production and Disposal from Urban Wastewater (in Dry Substance (d.s)). Available online: <https://ec.europa.eu/eurostat/web/products-datasets/-/ten00030> (accessed on 25 April 2019).
- Castro-Barros, C.M.; Daelman, M.R.J.; Mampaey, K.E.; van Loosdrecht, M.C.M.; Volcke, E.I.P. Effect of aeration regime on N<sub>2</sub>O emission from partial nitrification-anammox in a full-scale granular sludge reactor. *Water Res.* **2015**, *68*, 793–803.
- Thinkstep. Available online: <https://www.thinkstep.com/> (accessed on 29 April 2019).
